# Supplementary material
Source: publisher figshare collection journal article supplement (https://karger.figshare.com/articles/dataset/_/6833522)
Supplement: Supplementary file 1 [file 1]

**Suppl. Table 4.** Characteristics of patient-reported outcome measures

| INSTRUMENT NAME<br>(ACRONYM)              | PSYCHOMETRIC<br>STUDIES | INSTRUMENT<br>DEVELOPMENT PAPER       | INSTRUMENT<br>LANGUAGE(S) AVAILABLE | INSTRUMENT SUMMARY                                                                                                                                                                                                                                                                                                                                                                                                                                                                                                                                                                                                                                     | SCORING METHOD                                                                                                                                                                                                                                                                                                                                                                                                                                                                                                                                                                                                                                                                                                                                                                                                           |
|-------------------------------------------|-------------------------|---------------------------------------|-------------------------------------|--------------------------------------------------------------------------------------------------------------------------------------------------------------------------------------------------------------------------------------------------------------------------------------------------------------------------------------------------------------------------------------------------------------------------------------------------------------------------------------------------------------------------------------------------------------------------------------------------------------------------------------------------------|--------------------------------------------------------------------------------------------------------------------------------------------------------------------------------------------------------------------------------------------------------------------------------------------------------------------------------------------------------------------------------------------------------------------------------------------------------------------------------------------------------------------------------------------------------------------------------------------------------------------------------------------------------------------------------------------------------------------------------------------------------------------------------------------------------------------------|
| PSORIASIS-SPECIFIC MEASURES               |                         |                                       |                                     |                                                                                                                                                                                                                                                                                                                                                                                                                                                                                                                                                                                                                                                        |                                                                                                                                                                                                                                                                                                                                                                                                                                                                                                                                                                                                                                                                                                                                                                                                                          |
| Children's Scalpdex<br>in Psoriasis (CSP) | Oostveen et al.<br>[17] | Oostveen et al. [17]                  | Dutch<br>English                    | <p>Measurement of patient-reported experiences with pediatric scalp psoriasis. Based on the patient-reported outcomes questionnaire for adults, Scalpdex<sup>a</sup></p> <p>22-item instrument composed of 3 major constructs: symptoms, functioning, and emotions. All items enquire about patient's experience in the last 4 weeks</p> <p>Patients aged 6–12 may complete questionnaire with the assistance of a parent or guardian</p>                                                                                                                                                                                                              | <p>Each item scored on a 5-point Likert scale ("never" = 0, "rarely" = 25, "sometimes" = 50, "often" = 75, "all the time" = 100)</p> <p>Item 19, "I feel that my knowledge about caring for my scalp psoriasis is adequate," is reversed scored</p> <p>Global score is equal to the mean of responses to all items</p> <p>Lower scores are representative of better quality of life</p>                                                                                                                                                                                                                                                                                                                                                                                                                                  |
| Simplified Psoriasis<br>Index (SPI)       | Van Geel et al.<br>[18] | Chularojanamontri et al. <sup>b</sup> | Dutch<br>English                    | <p>Measurement of patient-reported experiences with pediatric psoriasis. Consists of a Dutch translation of the saSPI questionnaire<sup>b</sup> for adults with psoriasis with slight modifications to increase comprehension in children</p> <p>Composed of 3 sections:<br/>saSPI-s measures patient-reported disease severity by 10 anatomical locations<br/>SPI-p measures psychosocial impact according to a visual analog scale<br/>SPI-i measures history and interventions according to 4 items on disease course and 6 items on previous treatments</p> <p>Patients may complete questionnaire with the assistance of a parent or guardian</p> | <p>Global scores calculated for each independent domain:<br/>saSPI-s domain score (range 0–50) is calculated by multiplying a composite psoriasis extent score (range 0–10) by an overall average severity score (range 0–5). Composite psoriasis extent score rated on a 3-point scale (0 = absent or minimal, 0.5 = noticeable, 1 = extensive) for each body area, with extra weight given to scalp, face, hands, feet, and anogenital skin. Higher scores indicate greater disease severity</p> <p>SPI-p domain score (range 0–10) calculated on a 0–10 Likert scale derived from a 10-cm visual analog scale. Higher scores indicate larger psychosocial impact</p> <p>SPI-i domain score (range 0–10) calculated by adding summing scores across items. Higher scores indicate more extensive treatment history</p> |

| DERMATOLOGY-SPECIFIC MEASURES                                        |                                                                              |                                               |                                                                                                                                                                                                                    |                                                                                                                                                                                                              |                                                                                                                                                                                                                                                                                                                        |                                                                                                                                                                                                                                                                                                                                                                                                                                                                                                                                                                                                                                                                                                                                                                                                                                                                                                       |
|----------------------------------------------------------------------|------------------------------------------------------------------------------|-----------------------------------------------|--------------------------------------------------------------------------------------------------------------------------------------------------------------------------------------------------------------------|--------------------------------------------------------------------------------------------------------------------------------------------------------------------------------------------------------------|------------------------------------------------------------------------------------------------------------------------------------------------------------------------------------------------------------------------------------------------------------------------------------------------------------------------|-------------------------------------------------------------------------------------------------------------------------------------------------------------------------------------------------------------------------------------------------------------------------------------------------------------------------------------------------------------------------------------------------------------------------------------------------------------------------------------------------------------------------------------------------------------------------------------------------------------------------------------------------------------------------------------------------------------------------------------------------------------------------------------------------------------------------------------------------------------------------------------------------------|
| Children's Dermatology Life Quality Index (CDLQI)<br>Dutch version   | Oostveen et al. [21]<br><br>De Jager et al. [22]<br><br>Van Geel et al. [23] | Lewis-Jones M.S. and Finlay A.Y. <sup>c</sup> | Afrikaans<br>Arabic<br>Bahasa<br>Cantonese<br>Chinese<br>Croatian<br>Czech<br>Danish<br>Dutch<br>English<br>Estonian<br>Filipino<br>Finish<br>French<br>German<br>Greek<br>Hebrew<br>Hindi<br>Hungarian<br>Italian | Japanese<br>Korean<br>Latvian<br>Norwegian<br>Persian<br>Polish<br>Portuguese<br>Romanian<br>Russian<br>Slovak<br>Serbian<br>Spanish<br>Swedish<br>Taiwanese<br>Thai<br>Turkish<br>Twi<br>Ukranian<br>Yoruba | Measure of patient-reported psychosocial impact of pediatric psoriasis, ages 4–16 years<br><br>10-item questionnaire with 6 domains:<br>Symptoms and feelings (items 1 and 2)<br>Leisure (items 4–6)<br>School or holidays (item 7)<br>Personal relationships (items 3 and 8)<br>Sleep (item 9)<br>Treatment (item 10) | Each item scored on a 4-point Likert scale (“not at all” = 0, “only a little” = 1, “quite a lot” = 2, “very much” = 3)<br><br>Global score (range 0–30) is calculated by summing individual item scores<br><br>Domain scores may also be calculated:<br>Symptoms and feelings (0–6)<br>Leisure (0–9)<br>School or holidays (0–3)<br>Personal relationships (0–6)<br>Sleep (0–3)<br>Treatment (0–3)<br><br>Severity banding (effect on child's life) is assigned for the following scores <sup>d</sup> :<br>0–1 = no effect<br>2–6 = small effect<br>7–12 = moderate effect<br>13–18 = very large effect<br>19–30 = extremely large effect<br><br>Interpretation of incorrectly completed items:<br>If one question unanswered, assign score of 0 to that item<br>If ≥2 questions unanswered, questionnaire is not scored<br>If both parts of question 7 completed, count the higher of the two scores |
| Children's Dermatology Life Quality Index (CDLQI)<br>Swedish version | Ganemo et al.[24]                                                            |                                               |                                                                                                                                                                                                                    |                                                                                                                                                                                                              |                                                                                                                                                                                                                                                                                                                        |                                                                                                                                                                                                                                                                                                                                                                                                                                                                                                                                                                                                                                                                                                                                                                                                                                                                                                       |
| Children's Dermatology Life Quality Index (CDLQI)<br>English version | Langley et al. [25]                                                          |                                               |                                                                                                                                                                                                                    |                                                                                                                                                                                                              |                                                                                                                                                                                                                                                                                                                        |                                                                                                                                                                                                                                                                                                                                                                                                                                                                                                                                                                                                                                                                                                                                                                                                                                                                                                       |

|                                                                               |                     |                           |                                                             |                                                        |                                                                                                                                                                                                                                                                                                                                                                                                                                                                                                                                                                        |                                                                                                                                                                                                                                                                                                                                                                                                                                                                                                                                                                                                                                                                                                                                                                                                                                                                                                                              |
|-------------------------------------------------------------------------------|---------------------|---------------------------|-------------------------------------------------------------|--------------------------------------------------------|------------------------------------------------------------------------------------------------------------------------------------------------------------------------------------------------------------------------------------------------------------------------------------------------------------------------------------------------------------------------------------------------------------------------------------------------------------------------------------------------------------------------------------------------------------------------|------------------------------------------------------------------------------------------------------------------------------------------------------------------------------------------------------------------------------------------------------------------------------------------------------------------------------------------------------------------------------------------------------------------------------------------------------------------------------------------------------------------------------------------------------------------------------------------------------------------------------------------------------------------------------------------------------------------------------------------------------------------------------------------------------------------------------------------------------------------------------------------------------------------------------|
| Children's<br>Dermatology Life<br>Quality Index<br>(CDLQI)<br>Cartoon version | Langley et al. [25] | Holme et al. <sup>e</sup> | Afrikaans<br>Bahasa<br>Danish<br>Dutch<br>English<br>French | German<br>Hungarian<br>Italian<br>Japanese<br>Romanian | <p>Measure of patient-reported psychosocial impact of pediatric psoriasis. Identical to original CDLQI developed by Lewis-Jones and Finaly<sup>c</sup> with addition of graphics to improve comprehension in younger children</p> <p>10-item questionnaire with 6 domains:<br/>Symptoms and feelings (items 1 and 2)<br/>Leisure (items 4–6)<br/>School or holidays (item 7)<br/>Personal relationships (items 3 and 8)<br/>Sleep (item 9)<br/>Treatment (item 10)</p> <p>Patients aged 4–7 may complete questionnaire with the assistance of a parent or guardian</p> | <p>Each item scored on a 4-point Likert scale (“not at all” = 0, “only a little” = 1, “quite a lot” = 2, “very much” = 3)</p> <p>Global score (range 0–30) is calculated by summing individual item scores</p> <p>Domain scores may also be calculated:<br/>Symptoms and feelings (0–6)<br/>Leisure (0–9)<br/>School or holidays (0–3)<br/>Personal relationships (0–6)<br/>Sleep (0–3)<br/>Treatment (0–3)</p> <p>Severity banding (effect on child's life) is assigned for the following scores<sup>d</sup>:<br/>0–1 = no effect<br/>2–6 = small effect<br/>7–12 = moderate effect<br/>13–18 = very large effect<br/>19–30 = extremely large effect</p> <p>Interpretation of incorrectly completed items:<br/>If one question unanswered, assign score of 0 to that item<br/>If ≥2 questions unanswered, questionnaire is not scored<br/>If both parts of question 7 are completed, count the higher of the two scores</p> |
|-------------------------------------------------------------------------------|---------------------|---------------------------|-------------------------------------------------------------|--------------------------------------------------------|------------------------------------------------------------------------------------------------------------------------------------------------------------------------------------------------------------------------------------------------------------------------------------------------------------------------------------------------------------------------------------------------------------------------------------------------------------------------------------------------------------------------------------------------------------------------|------------------------------------------------------------------------------------------------------------------------------------------------------------------------------------------------------------------------------------------------------------------------------------------------------------------------------------------------------------------------------------------------------------------------------------------------------------------------------------------------------------------------------------------------------------------------------------------------------------------------------------------------------------------------------------------------------------------------------------------------------------------------------------------------------------------------------------------------------------------------------------------------------------------------------|

| GENERIC, NON-DERMATOLOGIC MEASURES           |                     |                           |                                                                                                                                                                                                                                                                                                                                                              |                                                                                                                                                                                                                                                                                                                                       |                                                                                                                                                                                                                                                                                                                                                                                                                                                                                                                                                                                                                       |                                                                                                                                                                                                                                                                                                                                                                                                                                                                                                                                                                                                                                                                                                                                                                                                                                                |
|----------------------------------------------|---------------------|---------------------------|--------------------------------------------------------------------------------------------------------------------------------------------------------------------------------------------------------------------------------------------------------------------------------------------------------------------------------------------------------------|---------------------------------------------------------------------------------------------------------------------------------------------------------------------------------------------------------------------------------------------------------------------------------------------------------------------------------------|-----------------------------------------------------------------------------------------------------------------------------------------------------------------------------------------------------------------------------------------------------------------------------------------------------------------------------------------------------------------------------------------------------------------------------------------------------------------------------------------------------------------------------------------------------------------------------------------------------------------------|------------------------------------------------------------------------------------------------------------------------------------------------------------------------------------------------------------------------------------------------------------------------------------------------------------------------------------------------------------------------------------------------------------------------------------------------------------------------------------------------------------------------------------------------------------------------------------------------------------------------------------------------------------------------------------------------------------------------------------------------------------------------------------------------------------------------------------------------|
| Pediatric Quality of Life Inventory (PedsQL) | Langley et al. [25] | Varni et al. <sup>f</sup> | Afrikaans<br>Arabic<br>Belarusian<br>Bengali<br>Bosnian<br>Bulgarian<br>Cantonese<br>Catalan<br>Chinese (Mandarin)<br>Croatian<br>Czech<br>Danish<br>Dutch<br>English<br>Estonian<br>Farsi<br>Finnish<br>French<br>Galician<br>Georgian<br>German<br>Greek<br>Hebrew<br>Hiligaynon<br>Hindi<br>Hungarian<br>Indonesian<br>Italian<br>Japanese<br>Kinyarwanda | Konkani<br>Korean<br>Latvian<br>Lithuanian<br>Malay<br>Marathi<br>Norwegian<br>Polish<br>Portuguese<br>Romanian<br>Russian<br>Serbian<br>Sesotho<br>S'gaw<br>Karen<br>Sinhalese<br>Slovak<br>Slovenian<br>Spanish<br>Swedish<br>Tagalog<br>Tamil<br>Telugu<br>Thai<br>Tongan<br>Turkish<br>Ukranian<br>Urdu<br>Welsh<br>Xhosa<br>Zulu | Measure of patient-reported health-related quality of life in both healthy and ill children and adolescents. Designed to measure core dimensions defined by the World Health Organization with the addition of role functioning (school)<br><br>23-item questionnaire with 4 subscales:<br>Physical functioning (8 items)<br>Emotional functioning (5 items)<br>Social functioning (5 items)<br>School functioning (5 items)<br><br>Four age-specific versions available: age 4, ages 5–7, ages 8–12, and ages 13–17<br><br>Two administration formats available:<br>The Child Self-Report<br>The Parent Proxy Report | Each item is administered on a 5-point Likert scale (“never” = 0, “almost never” = 1, “sometimes” = 2, “often” = 3, “almost always” = 4). Each item is then reverse scored, transforming the 0–4 scale to a 0–100 scale (0 = 100, 1 = 75, 2 = 50, 3 = 25, 4 = 0)<br><br>Physical functioning summary score is calculated as the sum of all items over the number of items answered in the physical functioning scale<br><br>Psychosocial health summary score is calculated as the sum of all items over the number of items answered in the emotional, social, and school functioning scales<br>Total scale score is calculated by dividing the sum of all items over the number of items answered<br><br>If >50% of items are missing, the scale score is not calculated<br><br>Higher scores indicate better health-related quality of life |

saSPI-s, self-assessment Simplified Psoriasis Index – current severity domain; SPI-p, Simplified Psoriasis Index – psychosocial impact domain; SPI-I, Simplified Psoriasis Index – history and intervention domain.

<sup>a</sup>Chen SC, Yeung J, Chren MM: Scalpdex: a quality-of-life instrument for scalp dermatitis. Arch Dermatol 2002;138:803–807.

<sup>b</sup>Chularojanamontri L, Griffiths CE, Chalmers RJ: The Simplified Psoriasis Index (SPI): a practical tool for assessing psoriasis. J Invest Dermatol 2013;133:1956–1962.

<sup>c</sup>Lewis-Jones MS, Finlay AY: The Children’s Dermatology Life Quality Index (CDLQI): initial validation and practical use. Br J Dermatol 1995;132:942–949.

<sup>d</sup>Waters A, Sandhu D, Beattie P, Ezughah F, Lewis-Jones S: Severity stratification of Children’s Dermatology Life Quality Index (CDLQI) scores. Br J Dermatol 2010;163:121.

<sup>e</sup>Holme SA, Man I, Sharpe SL, Dykes PS, Lewis-Jones MS, Finlay AY: The Children’s Dermatology Life Quality Index: validation of the cartoon version. Br J Dermatol 2003;148:285–290.

<sup>f</sup>Varni JW, Seid M, Rode CA: The PedsQL: measurement model for the pediatric quality of life inventory. Med Care 1999;37:126–139.
