# Supplementary material
Source: publisher figshare collection journal article supplement (https://karger.figshare.com/articles/dataset/_/6833522)
Supplement: Supplementary file 2 [file 1]

## Stage 1 Literature Search Strategy

Key words, MESH terms, and search filters were utilized by the review team to search (1) psoriasis disease,<sup>a</sup> (2) pediatric population<sup>b</sup> [1], (3) patient-reported outcomes<sup>c</sup> [2], and (3) measurement instruments.<sup>d</sup>

| <b>MEDLINE (January 2017)</b> |                                                                                                                                                                                                                                                                                                                                                                                                                                                                                               |
|-------------------------------|-----------------------------------------------------------------------------------------------------------------------------------------------------------------------------------------------------------------------------------------------------------------------------------------------------------------------------------------------------------------------------------------------------------------------------------------------------------------------------------------------|
| 1 <sup>a</sup>                | "Psoriasis"[MeSH] or Psoriasis[tiab] or Psoriasis[tiab] or Pustulosis of Palms and Soles[tiab] or Pustulosis Palmaris et Plantaris[tiab] or Palmoplantaris Pustulosis[tiab] or Pustular Psoriasis of Palms and Soles[tiab]                                                                                                                                                                                                                                                                    |
| 2 <sup>b</sup>                | Infan* OR newborn* OR new-born* OR perinat* OR neonat* OR baby OR baby* OR babies OR toddler* OR minors OR minors* OR boy OR boys OR boyfriend OR boyhood OR girl* OR kid OR kids OR child OR child* OR children* OR schoolchild* OR schoolchild OR school child[tiab] OR school child*[tiab] OR adolescen* OR juvenil* OR youth* OR teen* OR under*age* OR pubescen* OR pediatrics[mh] OR pediatric* OR paediatric* OR peadiatric* OR school[tiab] OR school*[tiab] OR prematur* OR preterm* |
| 3 <sup>c</sup>                | (HR-PRO[tiab] OR HRPRO[tiab] OR HRQL[tiab] OR HRQoL[tiab] OR QL[tiab] OR QoL[tiab] OR quality of life[tw] OR life quality[tw] OR health index*[tiab] OR health indices[tiab] OR health profile*[tiab] OR health status[tw] OR (patient[tiab] OR self[tiab] OR child[tiab] OR parent[tiab] OR carer[tiab] OR proxy[tiab]))                                                                                                                                                                     |
| 4 <sup>c</sup>                | (report[tiab] OR reported[tiab] OR reporting[tiab]) OR (rated[tiab] OR rating[tiab] OR ratings[tiab]) OR based[tiab] OR (assessed[tiab] OR assessment[tiab] OR assessments[tiab]) OR (disability[tiab] OR function[tiab] OR functional[tiab] OR functions[tiab] OR subjective[tiab] OR utility[tiab] OR utilities[tiab] OR wellbeing[tiab] OR well being[tiab])                                                                                                                               |
| 5 <sup>d</sup>                | index[tiab] OR indices[tiab] OR instrument[tiab] OR instruments[tiab] OR measure[tiab] OR measures[tiab] OR questionnaire[tiab] OR questionnaires[tiab] OR                                                                                                                                                                                                                                                                                                                                    |

|   |                                                                                                                                                |
|---|------------------------------------------------------------------------------------------------------------------------------------------------|
|   | profile[tiab] OR profiles[tiab] OR scale[tiab] OR scales[tiab] OR score[tiab] OR scores[tiab] OR status[tiab] OR survey[tiab] OR surveys[tiab] |
| 6 | 3 AND 4 AND 5                                                                                                                                  |
| 7 | 1 AND 6                                                                                                                                        |

## References

- 1 Leclercq E, Leeflang MM, van Dalen EC, Kremer LC: Validation of search filters for identifying pediatric studies in PubMed. *J Pediatr* 2013;62:629–634.
- 2 Mackintosh A, Casañas i Comabella C, Hadi M, Gibbons E, Fitzpatrick R; PROM group: PROM group construct and instrument type filters. 2010. <http://www.cosmin.nl/images/upload/files/PROM%20Gp%20filtersOCTOBER%202010FINAL.pdf> (accessed January 9, 2017).
