# Supplementary material
Source: publisher figshare collection journal article supplement (https://karger.figshare.com/articles/dataset/_/6833522)
Supplement: Supplementary file 3 [file 1]

**Suppl. Table 5.** Summary of results from studies on the measurement properties of patient-reported outcome measures

| INSTRUMENT<br>(ACRONYM)                | STUDY                | MEASUREMENT PROPERTIES                                                                    |                                          |                                                                                                                                                                                                                                                                                                                                                                                   |                                                                                                             |                                                                                                                                                                        |                         |                    |                                                                                                                                  |                                                                                                                                                                                                                                                                                                                                                                                                                                                                                                                      |              |
|----------------------------------------|----------------------|-------------------------------------------------------------------------------------------|------------------------------------------|-----------------------------------------------------------------------------------------------------------------------------------------------------------------------------------------------------------------------------------------------------------------------------------------------------------------------------------------------------------------------------------|-------------------------------------------------------------------------------------------------------------|------------------------------------------------------------------------------------------------------------------------------------------------------------------------|-------------------------|--------------------|----------------------------------------------------------------------------------------------------------------------------------|----------------------------------------------------------------------------------------------------------------------------------------------------------------------------------------------------------------------------------------------------------------------------------------------------------------------------------------------------------------------------------------------------------------------------------------------------------------------------------------------------------------------|--------------|
|                                        |                      | INTERNAL CONSISTENCY                                                                      | RELIABILITY (SAMPLE SIZE, TIME INTERVAL) | CONTENT VALIDITY                                                                                                                                                                                                                                                                                                                                                                  | STRUCTURAL VALIDITY                                                                                         | HYPOTHESIS TESTING                                                                                                                                                     | CROSS-CULTURAL VALIDITY | CRITERION VALIDITY | RESPONSIVENESS                                                                                                                   | TOTAL AND SUBGROUP SCORE DISTRIBUTION                                                                                                                                                                                                                                                                                                                                                                                                                                                                                | MID          |
| Children's Scalpdex in Psoriasis (CSP) | Oostveen et al. [17] | Cronbach's $\alpha$ , subscales: Symptoms = 0.69<br>Functioning = 0.74<br>Emotions = 0.91 | Not assessed                             | Items generated from Dutch translation of patient-reported outcome measure for adult scalp psoriasis, Scalpdex <sup>a</sup><br><br>Final item selection by expert panel of 2 dermatologists, 1 pediatric dermatologist, and 1 psychiatrist. Expert panel translated Scalpdex items into Dutch, modified items to be comprehensive to children, and performed final item reduction | CFA (rotation not reported) showed acceptable fit for 3-factor model<br><br>Variance explained not reported | Spearman correlations ( $r$ ) between CSP subscales and PaGA scalp: Symptoms, $r = 0.51$<br>Functioning, $r = 0.46$<br>Emotions, $r = 0.46$<br>All $p$ values $<0.001$ | Not assessed            | Not assessed       | Cohen's $d$ (effect size), from baseline to 1–7 months, by subscale:<br>Symptoms = 0.44<br>Functioning = 0.58<br>Emotions = 0.51 | Baseline total score distribution of subscales per treatment response as measured by PaGA scalp, mean $\pm$ SD:<br><br>Worse ( $n = 10$ ):<br>Symptoms, 21.7 $\pm$ 26.7<br>Functioning, 13.5 $\pm$ 23.6<br>Emotions 21.1 $\pm$ 22.3<br><br>Same ( $n = 16$ ):<br>Symptoms, 29.7 $\pm$ 19.7<br>Functioning, 17.8 $\pm$ 16.9<br>Emotions 25.0 $\pm$ 16.2<br><br>Better ( $n = 27$ ):<br>Symptoms, 36.1 $\pm$ 21.4<br>Functioning, 20.7 $\pm$ 15.6<br>Emotions 27.1 $\pm$ 18.3<br><br>Baseline total score distribution | Not reported |

of subscales per treatment response as measured by PhGA scalp, mean  $\pm$  SD:

Worse ( $n = 12$ ):  
Symptoms, 22.9  $\pm$  25.4  
Functioning, 16.2  $\pm$  22.4  
Emotions 27.4  $\pm$  22.2

Same ( $n = 15$ ):  
Symptoms, 30.6  $\pm$  26.7  
Functioning, 17.0  $\pm$  17.7  
Emotions 24.5  $\pm$  19.7

Better ( $n = 26$ ):  
Symptoms, 35.9  $\pm$  17.1  
Functioning, 20.4  $\pm$  15.4  
Emotions 24.9  $\pm$  16.0

|                                  |                      |              |              |              |              |                                                                                              |              |                                                                                                        |              |                                                                                                                                                                |              |
|----------------------------------|----------------------|--------------|--------------|--------------|--------------|----------------------------------------------------------------------------------------------|--------------|--------------------------------------------------------------------------------------------------------|--------------|----------------------------------------------------------------------------------------------------------------------------------------------------------------|--------------|
| Simplified Psoriasis Index (SPI) | Van Geel et al. [18] | Not assessed | Not assessed | Not assessed | Not assessed | Spearman correlations ( $r$ ) between saSPI-s and: CDLQI, $r = 0.64$<br>proSPI-s, $r = 0.67$ | Not assessed | Spearman correlations ( $r$ ) between: saSPI-s and PASI, $r = 0.69$<br><br>SPI-p and CDLQI, $r = 0.78$ | Not assessed | Median saSPI-s (range), 3.5 (0–30)<br><br>Median SPI-p (range), 3.0 (0–10)<br><br>Histogram of saSPI-s and SPI-p response distributions with frequency of each | Not reported |
|----------------------------------|----------------------|--------------|--------------|--------------|--------------|----------------------------------------------------------------------------------------------|--------------|--------------------------------------------------------------------------------------------------------|--------------|----------------------------------------------------------------------------------------------------------------------------------------------------------------|--------------|

SPI-p and:  
PASI,  $r = 0.40$   
proSPI-s,  $r = 0.43$

were not  
utilized

score presented in  
psychometric  
study

Spearman  
correlations  
( $r$ ) between  
saSPI-s and  
SPI-p,  $r = 0.68$

All  $p$  values  
<0.01

saSPI-s  
scores >30  
were not  
utilized

|                                                                    |                         |              |              |              |              |                                                                                                                                |              |              |                                                                                                                                                                                                                                      |                                                                                                                                                                                                                                                                                                                                                                                    |              |
|--------------------------------------------------------------------|-------------------------|--------------|--------------|--------------|--------------|--------------------------------------------------------------------------------------------------------------------------------|--------------|--------------|--------------------------------------------------------------------------------------------------------------------------------------------------------------------------------------------------------------------------------------|------------------------------------------------------------------------------------------------------------------------------------------------------------------------------------------------------------------------------------------------------------------------------------------------------------------------------------------------------------------------------------|--------------|
| Children's<br>Life Quality<br>Index<br>(CDLQI)<br>Dutch<br>version | Oostveen<br>et al. [21] | Not assessed | Not assessed | Not assessed | Not assessed | Pearson<br>correlations<br>( $r$ ) between<br>CDLQI-<br>Dutch<br>version and<br>PASI,<br>$r = 0.31$ ( $p$<br>value =<br>0.001) | Not assessed | Not assessed | Pearson correlations<br>( $r$ ) between<br>$\Delta$ CDLQI and $\Delta$ PASI<br>by treatment group:<br>All treatments, $r = 0.48$<br>Topical, $r = 0.48$<br>Dithranol, $r = 0.46$<br>Systemic, $r = 0.55$<br><br>All $p$ values <0.05 | Baseline mean<br>CDLQI $\pm$ SD<br>(range), $7.5 \pm 5.0$<br>(0–25)<br><br>Baseline mean<br>CDLQI scores by<br>gender:<br>Boys, 7.5<br>Girls, 7.6<br>( $p$ value = 0.89)<br><br>Baseline mean<br>CDLQI $\pm$ SD<br>scores by age<br>group:<br>12 years and<br>under ( $n = 68$ ),<br>$7.0 \pm 4.5$<br>12 years and<br>above ( $n = 53$ ),<br>$8.2 \pm 5.6$<br>( $p$ value = 0.173) | Not reported |
|--------------------------------------------------------------------|-------------------------|--------------|--------------|--------------|--------------|--------------------------------------------------------------------------------------------------------------------------------|--------------|--------------|--------------------------------------------------------------------------------------------------------------------------------------------------------------------------------------------------------------------------------------|------------------------------------------------------------------------------------------------------------------------------------------------------------------------------------------------------------------------------------------------------------------------------------------------------------------------------------------------------------------------------------|--------------|

Baseline mean CDLQI (95% CI) by treatment group:  
 All treatments, 7.5 (6.5–8.5)  
 Topical, 7.0 (5.8–8.2)  
 Dithranol, 8.4 (6.4–10.6)  
 Systemic, 9.0 (6.2–11.7)

|                      |              |              |              |              |                                                                                                                                                                    |              |              |              |                                                                                                                                                                      |              |
|----------------------|--------------|--------------|--------------|--------------|--------------------------------------------------------------------------------------------------------------------------------------------------------------------|--------------|--------------|--------------|----------------------------------------------------------------------------------------------------------------------------------------------------------------------|--------------|
| De Jager et al. [22] | Not assessed | Not assessed | Not assessed | Not assessed | Spearman correlations ( <i>r</i> ) between CDLQI-Dutch version and: PASI, <i>r</i> = 0.47 ( <i>p</i> value = 0.003) PGA, <i>r</i> = 0.51 ( <i>p</i> value = 0.001) | Not assessed | Not assessed | Not assessed | Median CDLQI (IQR), 6 (5–9)                                                                                                                                          | Not reported |
| Van Geel et al. [23] | Not assessed | Not assessed | Not assessed | Not assessed | Spearman correlations ( <i>r</i> ) between CDLQI-Dutch version and DLQI, <i>r</i> = 0.90 ( <i>p</i> value <0.001)                                                  | Not assessed | Not assessed | Not assessed | Mean CDLQI ± SD, 6.61 ± 5.74<br><br>Percent study population with CDLQI score by severity band:<br>0–1 = 18%<br>2–6 = 43%<br>7–12 = 21%<br>13–18 = 14%<br>19–30 = 4% | Not reported |

|                                                                    |                     |              |              |              |              |                                                                                                                                                                                                                                                                                      |              |              |                                                                                                                                                                                                                                                                 |                                                                                                                                                                                                                                                                                                                                                            |                                                                                                                                |
|--------------------------------------------------------------------|---------------------|--------------|--------------|--------------|--------------|--------------------------------------------------------------------------------------------------------------------------------------------------------------------------------------------------------------------------------------------------------------------------------------|--------------|--------------|-----------------------------------------------------------------------------------------------------------------------------------------------------------------------------------------------------------------------------------------------------------------|------------------------------------------------------------------------------------------------------------------------------------------------------------------------------------------------------------------------------------------------------------------------------------------------------------------------------------------------------------|--------------------------------------------------------------------------------------------------------------------------------|
| Children's Life Quality Index (CDLQI) Swedish Version              | Ganemo et al. [24]  | Not assessed | Not assessed | Not assessed | Not assessed | Spearman correlations ( <i>r</i> ), by age group, between CDLQI Swedish version and:<br>DFI, 5–8 years old, <i>r</i> = 0.004 ( <i>p</i> value <0.05)<br>DFI, 5–16 years old, <i>r</i> = 0.04 ( <i>p</i> value <0.05)<br>DFI, 9–16 years old, <i>r</i> = 0.34 ( <i>p</i> value >0.05) | Not assessed | Not assessed | Not assessed                                                                                                                                                                                                                                                    | Median CDLQI (range) by age group,<br>5–8 years old, 6 (2–11)<br>5–16 years old, 4 (0–24)<br>9–16 years old, 4 (0–24)<br><br>Mean CDLQI ± SD by age group,<br>5–8 years old, 6.4 ± 3.6<br>5–16 years old, 5.05 ± 5.0<br>9–16 years old, 4.7 ± 5.3<br><br>Median CDLQI (range) in children with joint complaints ( <i>n</i> = 4, 9–16 years old), 12 (0–24) | Not reported                                                                                                                   |
| Children's Life Quality Index (CDLQI) English and cartoon versions | Langley et al. [25] | Not assessed                                                                                                                                                                                                                                                                         | Not assessed | Not assessed | CDLQI English version mean percent (median percent) improvement from baseline to week 12 by treatment group:<br>Etanercept, 49.7 (66.7)<br>Placebo, 17.6 (23.5)<br><br>CDLQI cartoon version mean percent (median percent) improvement from baseline to week 12 | CDLQI (English and cartoon versions) mean ± SD score at baseline:<br>Etanercept group, 8.9 ± 6.0<br>Placebo group 10.0 ± 6.4<br><br>CDLQI (English and cartoon versions) median (range) score at baseline:<br>Etanercept group, 7.0 (0–26.0)                                                                                                               | MID = 2.5<br><br>Mean ΔCDLQI score from baseline to week 12 above MID for both etanercept group (5.4) and placebo group (3.1). |

---

|                                                                                                                                                                                                                                 |                                                                                                                                                                    |
|---------------------------------------------------------------------------------------------------------------------------------------------------------------------------------------------------------------------------------|--------------------------------------------------------------------------------------------------------------------------------------------------------------------|
| by treatment group:<br>Etanercept, 55.7<br>(66.7)<br>Placebo, 17.5 (0)                                                                                                                                                          | Placebo group,<br>9.5 (0–29.0)                                                                                                                                     |
| CDLQI (English and<br>cartoon versions)<br>mean percent<br>(median percent)<br>improvement from<br>baseline to week 2<br>by treatment group:<br>Etanercept, 27.4<br>(33.3)<br>Placebo, 8.0 (15.5)<br>( <i>p</i> value = 0.0333) | CDLQI (English<br>and cartoon<br>versions) mean ±<br>SD at 12 weeks,<br>PASI 75<br>achieved, 9.7 ±<br>5.6<br>PASI 75 not<br>achieved, 7.8 ±<br>6.4                 |
| CDLQI (English and<br>cartoon versions)<br>mean percent<br>(median percent)<br>improvement from<br>baseline to week 12<br>by treatment group:<br>Etanercept, 52.3<br>(66.7)<br>Placebo, 17.5 (15.5)                             | CDLQI (English<br>and cartoon<br>versions) median<br>(range) at 12<br>weeks,<br>PASI 75<br>achieved, 9.0 (0–<br>23.0)<br>PASI 75 not<br>achieved, 5.5 (0–<br>26.0) |
| CDLQI (English and<br>Cartoon versions)<br>mean ± SD (median)<br>change from<br>baseline to week 12<br>by treatment group:<br>Etanercept, 5.4 ± 5.6<br>(4.0)<br>Placebo, 3.1 ± 5.1<br>(1.0)                                     |                                                                                                                                                                    |
| CDLQI (English and<br>Cartoon versions)<br>mean % (median %)<br>improvement from<br>baseline to week 12<br>by PASI,                                                                                                             |                                                                                                                                                                    |

---

PASI 75 achieved, 75.1 (81.2)  
 PASI 75 not achieved, 29.8 (46.4)  
 PASI 50 achieved, 64.2 (75.0)  
 PASI 50 not achieved, 26.5 (11.5)  
 PASI 90 achieved, 80.3 (85.4)  
 PASI 90 not achieved, 45.4 (60.8)

|                                              |                     |              |              |              |              |              |              |              |              |                                                                                                                                                                                                                                                                                                                                                                                                                       |                                                                                                                                                                                                                                                                                                                                                                                                                                                                                  |                                                                                                                                                                                                    |
|----------------------------------------------|---------------------|--------------|--------------|--------------|--------------|--------------|--------------|--------------|--------------|-----------------------------------------------------------------------------------------------------------------------------------------------------------------------------------------------------------------------------------------------------------------------------------------------------------------------------------------------------------------------------------------------------------------------|----------------------------------------------------------------------------------------------------------------------------------------------------------------------------------------------------------------------------------------------------------------------------------------------------------------------------------------------------------------------------------------------------------------------------------------------------------------------------------|----------------------------------------------------------------------------------------------------------------------------------------------------------------------------------------------------|
| Pediatric Quality of Life Inventory (PedsQL) | Langley et al. [25] | Not assessed | <p>PedsQL mean ± SD (median) change from baseline to week 12 by treatment group:<br/>         Etanercept, 6.8 ± 17.6 (3.3)<br/>         Placebo, 3.8 ± 10.1 (0)</p> <p>PedsQL mean ± SD (median) change from baseline to week 12 by CDLQI response status for etanercept subgroup:<br/>         &lt;2.5 CDLQI change from baseline, 1.9 ± 8.3 (0)<br/>         ≥2.5 CDLQI change from baseline, 10.3 ± 20.7 (7.6)</p> | <p>PedsQL mean ± SD score at baseline by treatment group:<br/>         Etanercept, 74.8 ± 17.8<br/>         Placebo, 76.1 ± 16.9</p> <p>PedsQL median (range) score at baseline by treatment group:<br/>         Etanercept, 77.2 (5.4–100)<br/>         Placebo, 79.9 (30.4–100)</p> <p>PedsQL mean score at week 12 by treatment group:<br/>         Etanercept, 81.7<br/>         Placebo, 79.8</p> <p>PedsQL mean ± SD at week 12 by PASI, PASI 75 achieved, 74.7 ± 17.4</p> | <p>MID = 4.4 (previously reported in separate study)<sup>b</sup></p> <p>Mean ΔPedsQL score from baseline to week 12 above MID for etanercept group (6.8) but below MID for placebo group (3.8)</p> |
|----------------------------------------------|---------------------|--------------|--------------|--------------|--------------|--------------|--------------|--------------|--------------|-----------------------------------------------------------------------------------------------------------------------------------------------------------------------------------------------------------------------------------------------------------------------------------------------------------------------------------------------------------------------------------------------------------------------|----------------------------------------------------------------------------------------------------------------------------------------------------------------------------------------------------------------------------------------------------------------------------------------------------------------------------------------------------------------------------------------------------------------------------------------------------------------------------------|----------------------------------------------------------------------------------------------------------------------------------------------------------------------------------------------------|

---

PASI 75 not  
achieved, 75.1 ±  
18.5

PedsQL median  
(range) at week  
12 by PASI,  
PASI 75  
achieved, 77.2  
(81.1-100)  
PASI 75 not  
achieved, 77.2  
(5.4-98.9)

---

MID, minimal important difference; CSP, Children's Scalpdex in Psoriasis; CFA, confirmatory factor analysis; PaGA, Patient Global Assessment; PhGA, Physician Global Assessment; SPI, Simplified Psoriasis Index; saSPI-s, self-assessment Simplified Psoriasis Index – severity subscale; CDLQI, Children's Dermatology Life Quality Index; proSPI-s, professional-assessment Simplified Psoriasis Index – current severity domain; SPI-p, Simplified Psoriasis Index – psychosocial impact domain; PASI, Psoriasis Area and Severity Index; PGA, Physician's Global Assessment; IQR, interquartile range; DFI, Dermatitis Family Impact Questionnaire; PedsQL, Pediatric Quality of Life Inventory.

<sup>a</sup>Chen SC, Yeung J, Chren MM: Scalpdex: a quality-of-life instrument for scalp dermatitis. Arch Dermatol 2002;13):803–807.

<sup>b</sup>Varni JW, Burwinkle TM, Seid M, Skarr D: The PedsQL 4.0 as a pediatric population health measure: feasibility, reliability, and validity. Ambul Pediatr 2003;3:329–341.
