# Supplementary material
Source: publisher figshare collection journal article supplement (https://karger.figshare.com/articles/dataset/_/6833522)
Supplement: Supplementary file 4 [file 1]

**Suppl. Table 2.** Levels of evidence for the quality of the measurement property

| LEVEL       | RATING                    | CRITERIA                                                                                                                   |
|-------------|---------------------------|----------------------------------------------------------------------------------------------------------------------------|
| Strong      | +++, ? (strong),<br>or —  | Consistent findings in multiple studies of good methodological quality OR in one study of excellent methodological quality |
| Moderate    | ++, ? (moderate),<br>or — | Consistent findings in multiple studies of fair methodological quality OR in one study of good methodological quality      |
| Limited     | +, ? (limited), or<br>—   | One study of fair methodological quality                                                                                   |
| Conflicting | +/-                       | Conflicting findings                                                                                                       |
| Unknown     | ?                         | Only studies of poor methodological quality                                                                                |

+, positive rating; ?, indeterminate rating; —, negative rating. Each instrument's measurement property is assigned an independent rating. Ratings reflect a combination of quality criteria ratings (online suppl. Table 1) and COSMIN methodological quality ratings (Table 3).

Adaptation of the Cronbach Review Group's criteria [16]. Reproduced with permission from Terwee et al. [14].
