# Supplementary material
Source: publisher figshare collection journal article supplement (https://karger.figshare.com/articles/dataset/_/6833522)
Supplement: Supplementary file 5 [file 1]

**Suppl. Table 3.** Characteristics of studies on the measurement properties of patient-reported outcome measures

| STUDY                       | MEASUREMENT PROPERTIES ASSESSED                                          | STUDY TYPE AND POPULATION SETTING                                                                                                                                                                                                                                                                                                          | COUNTRY (LANGUAGE)      | SAMPLE SIZE (% FEMALES) | MEAN OR MEDIAN AGE (RANGE), YEARS      | AGE OF PSORIASIS ONSET, YEARS         | DISEASE DURATION $\pm$ SD (RANGE)           | PSORIASIS TYPE, N (%)     | TREATMENT HISTORY OR STUDY INTERVENTION                                                     | PSORIATIC ARTHRITIS, N (%) | PSORIASIS FAMILY HISTORY, N (%) |
|-----------------------------|--------------------------------------------------------------------------|--------------------------------------------------------------------------------------------------------------------------------------------------------------------------------------------------------------------------------------------------------------------------------------------------------------------------------------------|-------------------------|-------------------------|----------------------------------------|---------------------------------------|---------------------------------------------|---------------------------|---------------------------------------------------------------------------------------------|----------------------------|---------------------------------|
| PSORIASIS-SPECIFIC MEASURES |                                                                          |                                                                                                                                                                                                                                                                                                                                            |                         |                         |                                        |                                       |                                             |                           |                                                                                             |                            |                                 |
| Oostveen et al. [17]        | Internal consistency, structural validity, and hypothesis testing of CSP | Longitudinal, observational, single-center study<br><br>Pediatric patients with scalp psoriasis, ages 6–17, with >5% scalp area involvement. Recruited from the Child-CAPTURE cohort from March 2011 to May 2012. Data analyzed from baseline visit                                                                                        | The Netherlands (Dutch) | 94 (59.6)               | Mean $\pm$ SD<br>12.4 $\pm$ 3.3 (6–17) | Mean $\pm$ SD<br>8.3 $\pm$ 4.2 (0–17) | Mean $\pm$ SD<br>3.7 $\pm$ 3.5 years (0–13) | Scalp psoriasis, 94 (100) | Not reported                                                                                | Not reported               | Not reported                    |
|                             | Responsiveness of CSP                                                    | Longitudinal, observational, single-center study<br><br>Pediatric patients with scalp psoriasis, ages 6–17, recruited from the Child-CAPTURE cohort from March 2011 to May 2012<br><br>Data from children with scalp psoriasis undergoing treatment were collected 1–7 months (mean $\pm$ SD 4.3 $\pm$ 1.8) following baseline assessments | The Netherlands (Dutch) | 53 (not reported)       | Not reported                           | Not reported                          | Not reported                                | Scalp psoriasis, 94 (100) | Patients treated for scalp psoriasis according to physician's opinion. Details not reported | Not reported               | Not reported                    |

|                      |                                                  |                                                                                                                                                                                                                 |                         |            |                     |              |              |                             |                                                                                                                                                                                                                                                               |                                |           |
|----------------------|--------------------------------------------------|-----------------------------------------------------------------------------------------------------------------------------------------------------------------------------------------------------------------|-------------------------|------------|---------------------|--------------|--------------|-----------------------------|---------------------------------------------------------------------------------------------------------------------------------------------------------------------------------------------------------------------------------------------------------------|--------------------------------|-----------|
| Van Geel et al. [18] | Hypothesis testing and criterion validity of SPI | Cross-sectional, observational, single-center study<br><br>Pediatric patients with plaque psoriasis, ages 4–17, from the Child-CAPTURE cohort. Data extracted from visits between September 2013 and April 2014 | The Netherlands (Dutch) | 113 (54.9) | Median<br>12 (4–17) | Not reported | Not reported | Plaque psoriasis, 113 (100) | Past treatments, <i>n</i> (%):<br>Topical, 113 (100)<br>Dithranol, 46 (40.7)<br>Phototherapy, 36 (31.9)<br>Methotrexate, 15 (13.3)<br>Cyclosporine, 1 (0.9)<br>Fumaric acid esters, 5 (4.4)<br>Acitretin, 1 (0.9)<br>Dapsone, 1 (0.9)<br>Biologicals, 7 (6.2) | Psoriasis diagnosis<br>3 (2.7) | 69 (61.1) |
|----------------------|--------------------------------------------------|-----------------------------------------------------------------------------------------------------------------------------------------------------------------------------------------------------------------|-------------------------|------------|---------------------|--------------|--------------|-----------------------------|---------------------------------------------------------------------------------------------------------------------------------------------------------------------------------------------------------------------------------------------------------------|--------------------------------|-----------|

#### DERMATOLOGY-SPECIFIC MEASURES

|                      |                                           |                                                                                                                                                                                                                          |                         |            |                                   |                               |                                            |              |              |                                |           |
|----------------------|-------------------------------------------|--------------------------------------------------------------------------------------------------------------------------------------------------------------------------------------------------------------------------|-------------------------|------------|-----------------------------------|-------------------------------|--------------------------------------------|--------------|--------------|--------------------------------|-----------|
| Oostveen et al. [21] | Hypothesis testing of CDLQI-Dutch version | Longitudinal, observational, single-center study<br><br>Pediatric patients with psoriasis, ages 3–17, recruited from the Child-CAPTURE cohort between September 2008 and October 2011. Data analyzed from baseline visit | The Netherlands (Dutch) | 125 (63.2) | Mean ± SD<br>10.7 ± 3.9<br>(3–17) | Mean ± SD<br>7.4 ± 3.9 (0–16) | Mean ± SD<br>39.2 ± 37.0<br>months (1–154) | Not reported | Not reported | Psoriasis diagnosis<br>1 (0.8) | 88 (70.4) |
|----------------------|-------------------------------------------|--------------------------------------------------------------------------------------------------------------------------------------------------------------------------------------------------------------------------|-------------------------|------------|-----------------------------------|-------------------------------|--------------------------------------------|--------------|--------------|--------------------------------|-----------|



|                      |                                             |                                                                                                                                                                                                            |                         |         |                   |                   |                          |                                                                                      |                                                                                                                                                                                                                                                       |                                             |              |
|----------------------|---------------------------------------------|------------------------------------------------------------------------------------------------------------------------------------------------------------------------------------------------------------|-------------------------|---------|-------------------|-------------------|--------------------------|--------------------------------------------------------------------------------------|-------------------------------------------------------------------------------------------------------------------------------------------------------------------------------------------------------------------------------------------------------|---------------------------------------------|--------------|
| Van Geel et al. [23] | Hypothesis testing of CDLQI Dutch version   | Cross-sectional, observational, single-center study<br><br>Pediatric patients with psoriasis, ages 16–17, from the Child-CAPTURE cohort. Data extracted from visits between August 2011 and September 2015 | The Netherlands (Dutch) | 56 (57) | Mean 16.6 (16–17) | Not reported      | Not reported             | Not reported                                                                         | Past treatments, <i>n</i> (%):<br>Topical, 38 (68)<br>Systemic with topical, 7 (13)<br>Systemic without topical, 4 (7)<br>None, 7 (13)                                                                                                                | Not reported                                | Not reported |
| Ganemo et al. [24]   | Hypothesis testing of CDLQI Swedish version | Cross-sectional observational, multicenter study<br><br>Pediatric patients with psoriasis, ages 5–16, recruited from 2 university hospitals                                                                | Sweden (Swedish)        | 45 (62) | Median 12 (4–16)  | Median 7 (0.5–15) | Median 27 months (1–180) | Plaque psoriasis (87%)<br><br>Inverse psoriasis (36%)<br><br>Guttate psoriasis (18%) | Current psoriasis and joint pain treatment, <i>n</i> = 42 (93%):<br>Moisturizers, 73%<br>Topical glucocorticoid, 53%<br>Topical calcipotriol, 56%<br>Phototherapy, 24%<br>Methotrexate, 2%<br>Systemic retinoids, 2%<br>Paracetamol or diclofenac, 4% | Joint pain, 4<br><br>Psoriasis diagnosis, 2 | 22 (49)      |

|                     |                                                                   |                                                                                                                                                                                                                                                                                                                                                                                                                                                              |               |            |                                                                                             |              |                                                                                                         |                             |                                                                                         |                                                                           |              |
|---------------------|-------------------------------------------------------------------|--------------------------------------------------------------------------------------------------------------------------------------------------------------------------------------------------------------------------------------------------------------------------------------------------------------------------------------------------------------------------------------------------------------------------------------------------------------|---------------|------------|---------------------------------------------------------------------------------------------|--------------|---------------------------------------------------------------------------------------------------------|-----------------------------|-----------------------------------------------------------------------------------------|---------------------------------------------------------------------------|--------------|
| Langley et al. [25] | Responsiveness of CDLQI English version and CDLQI cartoon version | Randomized, multi-center, clinical trial<br><br>Pediatric patients with moderate-to-severe plaque psoriasis, ages 4–17 years, participating in a 12-week randomized, double-blind, placebo-controlled phase III study of etanercept with a 24-week OLE.<br><br>Questionnaires administered at baseline and weeks 2, 4, and 12. CDLQI cartoon version administered to patients 4–12 years old. CDLQI English version administered to patients 13–17 years old | USA (English) | 211 (48.8) | Etanercept treatment group median 14 (4–17)<br><br>Placebo treatment group median 13 (4–17) | Not reported | Etanercept treatment group median 7 years (<1–17)<br><br>Placebo treatment group median 6 years (<1–17) | Plaque psoriasis, 211 (100) | Intervention: 12-week etanercept, <i>n</i> = 106<br><br>12-week placebo, <i>n</i> = 105 | Etanercept treatment group, 5 (5)<br><br>Placebo treatment group, 14 (13) | Not reported |
|---------------------|-------------------------------------------------------------------|--------------------------------------------------------------------------------------------------------------------------------------------------------------------------------------------------------------------------------------------------------------------------------------------------------------------------------------------------------------------------------------------------------------------------------------------------------------|---------------|------------|---------------------------------------------------------------------------------------------|--------------|---------------------------------------------------------------------------------------------------------|-----------------------------|-----------------------------------------------------------------------------------------|---------------------------------------------------------------------------|--------------|

GENERIC NONDERMATOLOGICAL MEASURES

|                     |                          |                                                                                                                                                                                                                                                                                                            |               |            |                                                                                             |              |                                                                                                         |                             |                                                                                         |                                                                           |              |
|---------------------|--------------------------|------------------------------------------------------------------------------------------------------------------------------------------------------------------------------------------------------------------------------------------------------------------------------------------------------------|---------------|------------|---------------------------------------------------------------------------------------------|--------------|---------------------------------------------------------------------------------------------------------|-----------------------------|-----------------------------------------------------------------------------------------|---------------------------------------------------------------------------|--------------|
| Langley et al. [25] | Responsiveness of PedsQL | Randomized, multicenter, clinical trial<br><br>Pediatric patients with moderate-to-severe plaque psoriasis, ages 4–17, participating in a 12-week randomized, double-blind, placebo-controlled phase III study of etanercept with a 24-week OLE<br><br>Questionnaires administered at baseline and week 12 | USA (English) | 211 (48.8) | Etanercept treatment group median 14 (4–17)<br><br>Placebo treatment group median 13 (4–17) | Not reported | Etanercept treatment group median 7 years (<1–17)<br><br>Placebo treatment group median 6 years (<1–17) | Plaque psoriasis, 211 (100) | Intervention: 12-week etanercept, <i>n</i> = 106<br><br>12-week placebo, <i>n</i> = 105 | Etanercept treatment group, 5 (5)<br><br>Placebo treatment group, 14 (13) | Not reported |
|---------------------|--------------------------|------------------------------------------------------------------------------------------------------------------------------------------------------------------------------------------------------------------------------------------------------------------------------------------------------------|---------------|------------|---------------------------------------------------------------------------------------------|--------------|---------------------------------------------------------------------------------------------------------|-----------------------------|-----------------------------------------------------------------------------------------|---------------------------------------------------------------------------|--------------|

CSP, Children's Scalpdx in Psoriasis; SPI, Simplified Psoriasis Index; CDLQI, Children's Dermatology Life Quality Index; IQR, interquartile range; OLE, open label extension; PedsQL, Pediatric Quality of Life Inventory.

<sup>3</sup>De Jager ME, de Jong EM, van de Kerkhof PC, Seyger MM: Efficacy and safety of treatments for childhood psoriasis: a systematic literature review. *J Am Acad Dermatol*. 2010;62:1013–1030.
