# Supplementary material
Source: publisher figshare collection journal article supplement (https://karger.figshare.com/articles/dataset/_/6833522)
Supplement: Supplementary file 8 [file 1]

**Suppl. Table 1. Quality criteria for measurement properties**

| PROPERTY                | RATING              | QUALITY CRITERIA                                                                                                                                                                                                                                                         |                                                     |
|-------------------------|---------------------|--------------------------------------------------------------------------------------------------------------------------------------------------------------------------------------------------------------------------------------------------------------------------|-----------------------------------------------------|
| <b>RELIABILITY</b>      |                     |                                                                                                                                                                                                                                                                          |                                                     |
| Internal consistency    | +                   | Cronbach's $\alpha(s) \geq 0.70$                                                                                                                                                                                                                                         |                                                     |
|                         | ?                   | Cronbach's $\alpha$ not determined or dimensionality unknown                                                                                                                                                                                                             |                                                     |
|                         | -                   | Cronbach's $\alpha(s) < 0.70$                                                                                                                                                                                                                                            |                                                     |
| Reliability             | +                   | ICC/weighted $\kappa \geq 0.70$ OR Pearson's $r \geq 0.80$                                                                                                                                                                                                               |                                                     |
|                         | ?                   | Neither ICC/weighted $\kappa$ nor Pearson's $r$ determined                                                                                                                                                                                                               |                                                     |
|                         | -                   | ICC/weighted $\kappa < 0.70$ OR Pearson's $r < 0.80$                                                                                                                                                                                                                     |                                                     |
| Measurement error       | +                   | MIC > SDC OR MIC outside the LOA                                                                                                                                                                                                                                         |                                                     |
|                         | ?                   | MIC not defined                                                                                                                                                                                                                                                          |                                                     |
|                         | -                   | MIC $\leq$ SDC OR MIC equals or inside LOA                                                                                                                                                                                                                               |                                                     |
| <b>VALIDITY</b>         |                     |                                                                                                                                                                                                                                                                          |                                                     |
| Content validity        | +                   | All items are considered to be relevant for the construct to be measured, for the target population, and for the purpose of the measurement, AND the questionnaire is considered to be comprehensive                                                                     |                                                     |
|                         | ?                   | Not enough information available                                                                                                                                                                                                                                         |                                                     |
|                         | -                   | Not all items are considered to be relevant for the construct to be measured, for the target population, and for the purpose of the measurement, OR the questionnaire is not considered to be comprehensive                                                              |                                                     |
| Construct validity      |                     |                                                                                                                                                                                                                                                                          |                                                     |
|                         | Structural validity | +                                                                                                                                                                                                                                                                        | Factors should explain at least 50% of the variance |
|                         |                     | ?                                                                                                                                                                                                                                                                        | Explained variance not mentioned                    |
| -                       |                     | Factors explain <50% of the variance                                                                                                                                                                                                                                     |                                                     |
| Hypothesis testing      | +                   | Correlations with instruments measuring the same construct $\geq 0.50$ , OR at least 75% of the results are in accordance with the hypothesis AND correlations with related constructs are higher than with unrelated constructs                                         |                                                     |
|                         | ?                   | Solely correlations determined with unrelated constructs                                                                                                                                                                                                                 |                                                     |
|                         | -                   | Correlations with instruments measuring the construct <0.50, OR <75% of the results are in accordance with the hypotheses OR correlations with related constructs are lower than with unrelated constructs                                                               |                                                     |
| Cross-cultural validity | +                   | No differences in factor structure OR no important DIF between language versions                                                                                                                                                                                         |                                                     |
|                         | ?                   | Multiple group factor analysis not applied AND DIF not assessed                                                                                                                                                                                                          |                                                     |
|                         | -                   | Differences in factor structure OR important DIF between language versions                                                                                                                                                                                               |                                                     |
| Criterion validity      | +                   | Convincing arguments that gold standard is "gold" AND correlation with gold standard $\geq 0.70$                                                                                                                                                                         |                                                     |
|                         | ?                   | No convincing arguments that gold standard is "gold"                                                                                                                                                                                                                     |                                                     |
|                         | -                   | Correlation with gold standard <0.70                                                                                                                                                                                                                                     |                                                     |
| <b>RESPONSIVENESS</b>   |                     |                                                                                                                                                                                                                                                                          |                                                     |
| Responsiveness          | +                   | Correlation with changes on instruments measuring the same construct $\geq 0.50$ , OR at least 75% of the results are in accordance with the hypotheses OR AUC $\geq 0.70$ AND correlations with changes in related constructs are higher than with unrelated constructs |                                                     |
|                         | ?                   | Solely correlations determined with unrelated constructs                                                                                                                                                                                                                 |                                                     |
|                         | -                   | Correlations with changes on instruments measuring the same construct <0.50, OR <75% of the results are in accordance with the hypotheses OR AUC <0.70 OR correlations with changes in related constructs are lower than with unrelated constructs                       |                                                     |

MIC, minimal important change; SDC, smallest detectable change; LOA, limits of agreement, ICC, intraclass correlation coefficient; DIF, differential item functioning; AUC, area under the curve.

+, positive rating; ?, indeterminate rating; -, negative rating.

Reproduced with permission from Terwee et al. [14].
